# Supplementary material for: A D–π–A-type ratiometric fluorescent probe to detect polarity changes and inhibition effect during ferroptosis
Source: Royal Society of Chemistry journal article supplement (doi:10.1039/d4ay00519h), 2024-01-01

**The D  $\pi$  A type ratiometric fluorescent probe to detect polarity changes and inhibition effect during ferroptosis**

Abdul Hadi Mehmood, Chang Jia, Yan Wang, Shijing Li, Ma jia le, Baoli Dong, Hong Liu

School of Chemistry and Chemical Engineering, University of Jinan, Jinan, Shandong 250022, China

\* Corresponding Author, E-mail address: [hongliu@sdu.edu.cn](mailto:hongliu@sdu.edu.cn) (H Liu)

## Table of Contents

|                                   |       |
|-----------------------------------|-------|
| 1. Materials and instruments..... | S3    |
| 2. Cytotoxicity experiment.....   | S3    |
| 3. Fig. S1-S9.....                | S4-S9 |

## 1. Materials and instruments

All solvents and reagents were commercially available and used without further purification. Doubly distilled water was used in all the experiments. Thin-layer chromatography (TLC) analysis was performed on silica gel plates and column chromatography was conducted over silica gel (mesh 200-300), both of which were purchased from the Qingdao Ocean Chemicals. Fluorescence spectra and relative fluorescence intensity were measured with a Hitachi F-4600 spectrofluorimeter with a 10 mm quartz cuvette. UV/vis spectra were obtained with a Shimadzu UV-2700 spectrophotometer. High-resolution mass spectra (HRMS) for the characterization of structures were collected using a Bruker apex-Ultra mass spectrometer (Bruker Daltonics Corp., USA) in electrospray ionization (ESI) mode.  $^1\text{H}$  and  $^{13}\text{C}$  NMR spectra were recorded on an AVANCE III 400 MHz Digital NMR Spectrometer, using tetramethylsilane (TMS) as internal reference. LC-MS were collected using an Agilent 6510 Q-TOF LC/MS.

## 2. Cytotoxicity experiment

Exploited by standard MTT assay the cell viability of the probe **Po-P** was judged. The HeLa cells inoculated in 96-well plates of density around 8000 cells/well. The HeLa cells were bred overnight down the medium of 100  $\mu\text{L}$  along with consistency of various concentrations (0-50M) of the probe **Po-P** for 24 hrs. 10  $\mu\text{L}$  MTT was individually inserted to several wells for additional 3 hours incubation. Subsequently, 100  $\mu\text{L}$  of DMSO was practiced for the dissolving of resulted-precipitate, thereafter the plate was shaken for 40 mints. The micro-plate reader (Thermo Fisher Scientific) was operated to determine the absorbance of resultant-solution and to estimate the cytotoxicity for the probe **Po-P**.

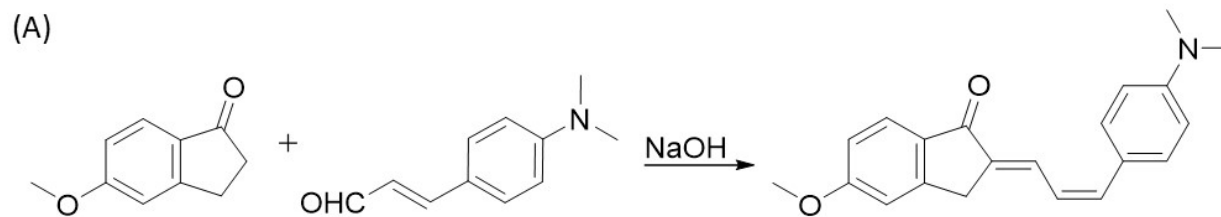

Figure 1. Synthesis route of probe **Po-P**.

#### Single Mass Analysis

Tolerance = 20.0 PPM / DBE: min = -1.5, max = 50.0

Element prediction: Off

Number of isotope peaks used for i-FIT = 3

Monoisotopic Mass, Even Electron Ions

442 formula(e) evaluated with 1 results within limits (up to 50 closest results for each mass)

Elements Used:

C: 21-21 H: 22-22 N: 0-100 O: 0-100 Na: 0-1

14

230811-10-E-0730 5 (0.076)

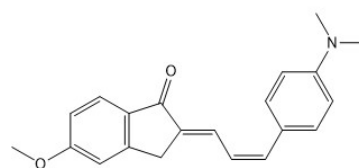

Exact Mass: 319.16

1: TOF MS ES+  
6.44e+006

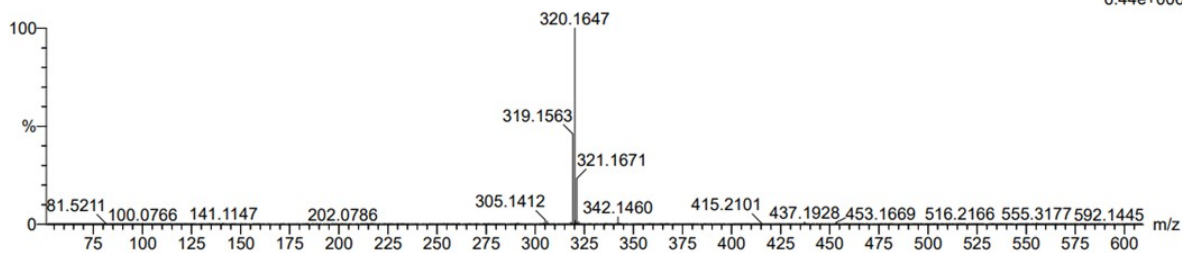

Figure 2. Single mass analysis of the probe **Po-P**.

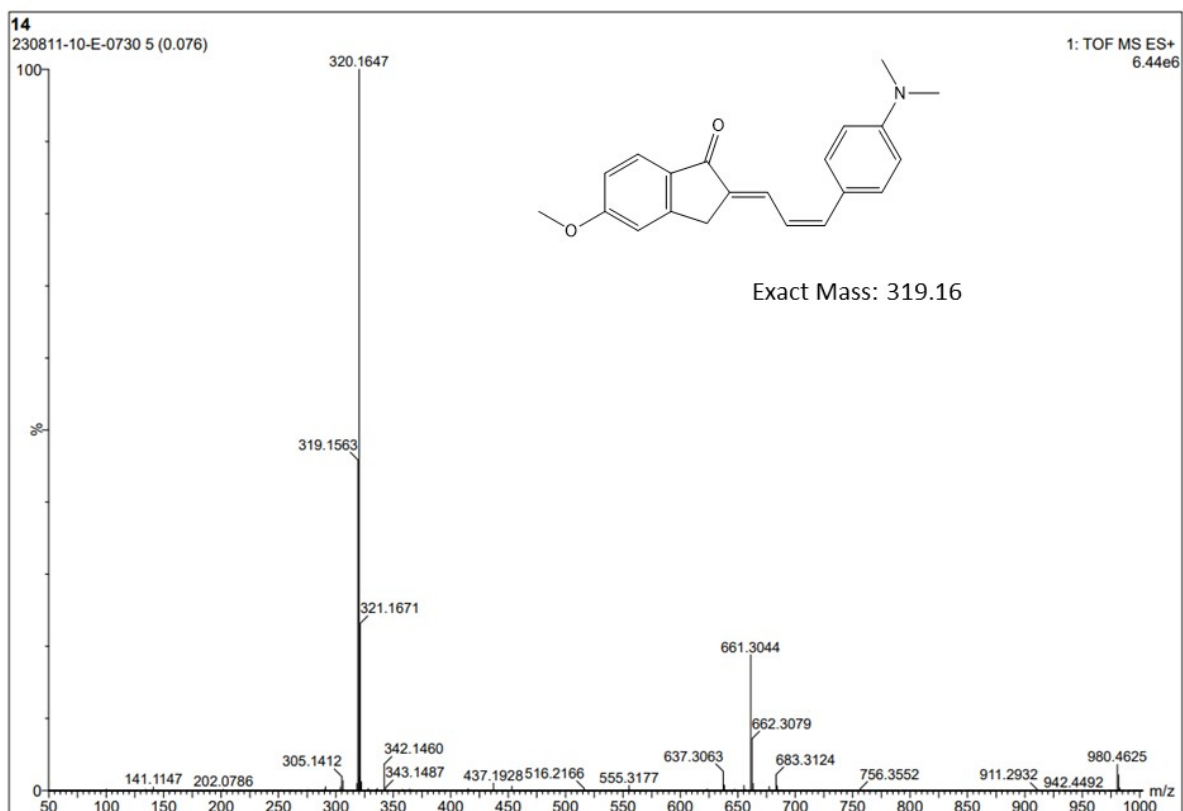

Figure 3. HRMS of the probe **Po-P**.

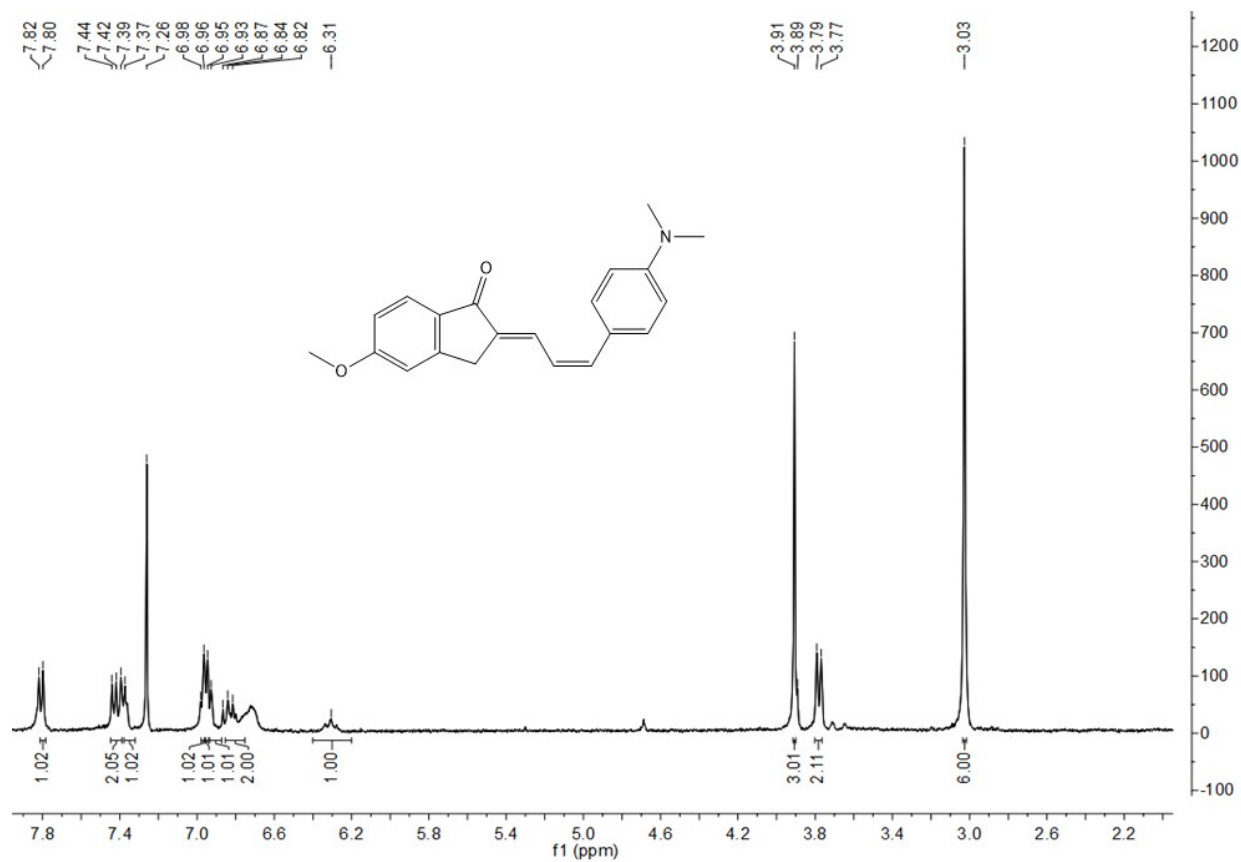

Figure 4. <sup>1</sup>H NMR of the probe **Po-P**.

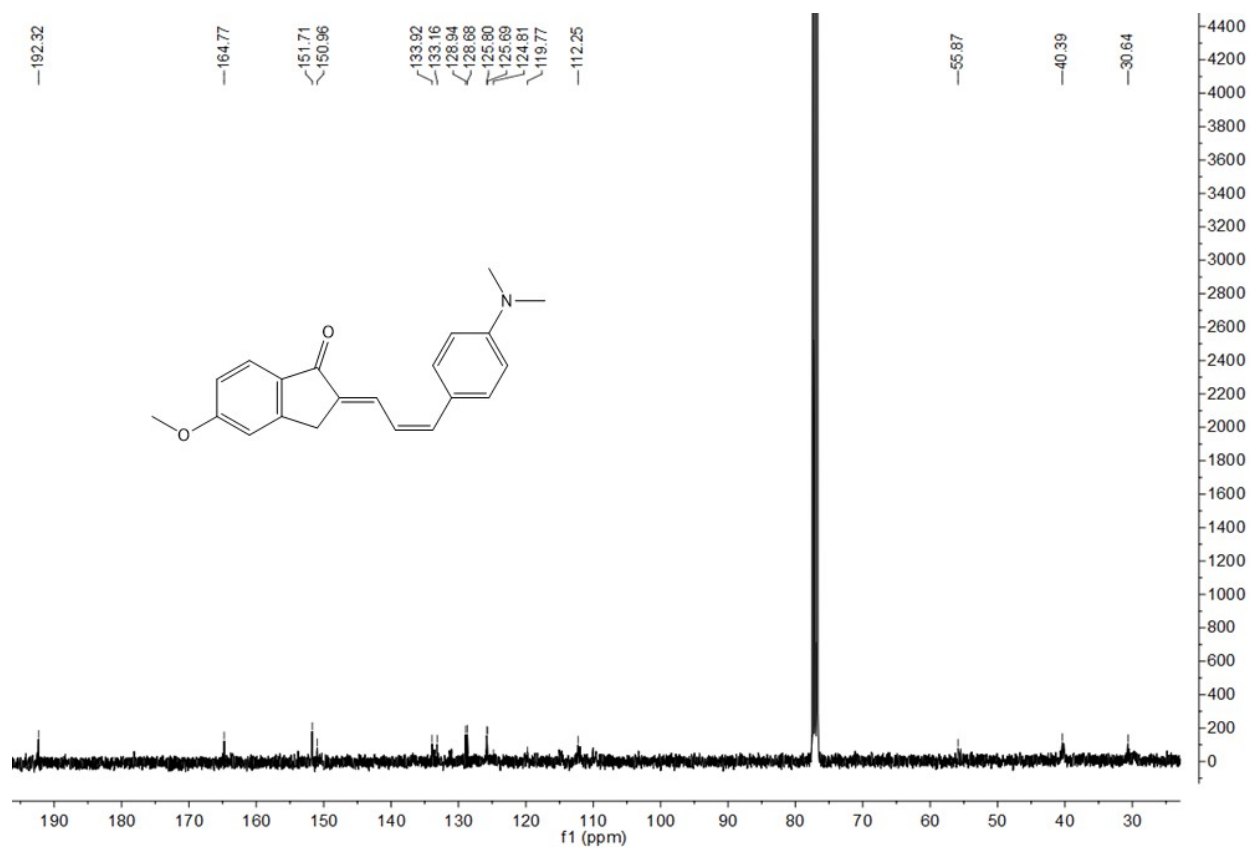

Figure 5.  $^{13}\text{C}$  NMR of the probe **Po-P**.

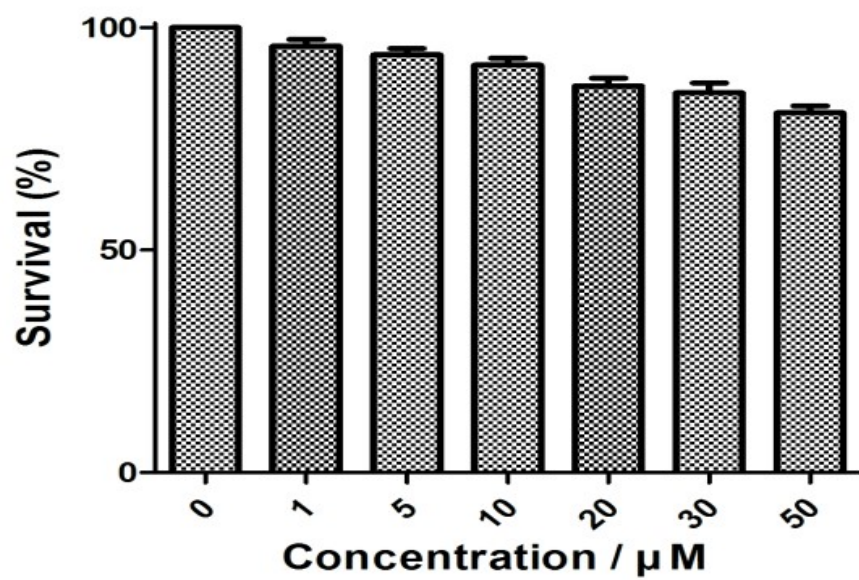

Figure 6. Viability of HeLa cells treated with various concentrations of the probe **Po-P**.

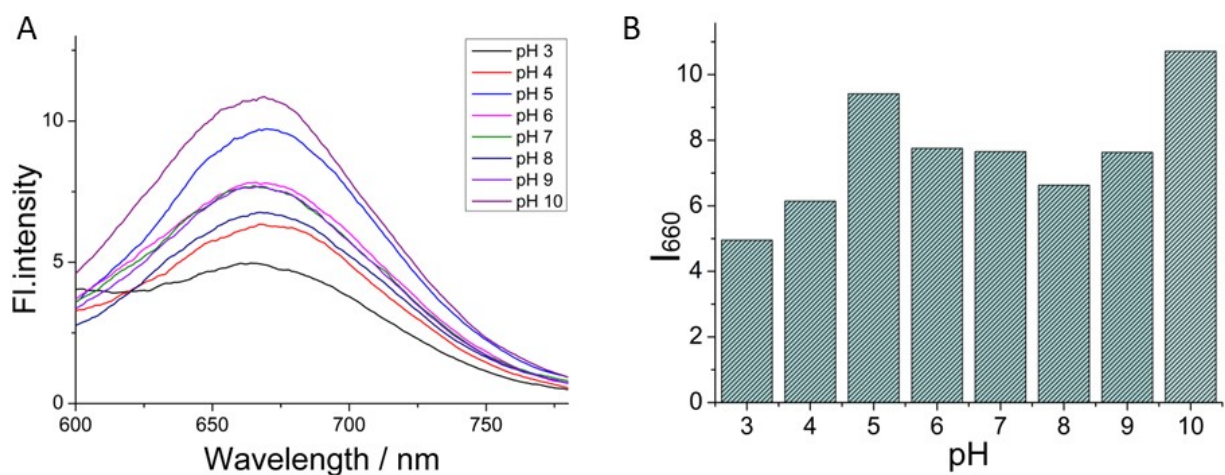

Figure 7. **A.** Fluorescence spectra of 5  $\mu$ M Po-P at various pH. **B.** Fluorescence spectra of 5  $\mu$ M Po-P at 660 nm.

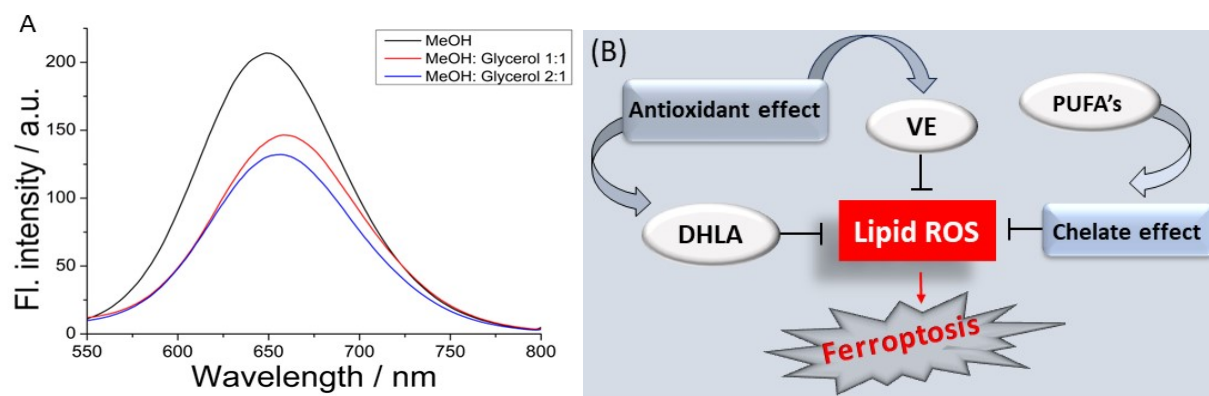

Figure 8. **A.** Fluorescence spectra of 5  $\mu$ M Po-P in MeOH-glycerol system.  $\lambda_{ex}$  = 410 nm. **B.** (B) Inhibition procedure of Vit E, and DHLA during ferroptosis.



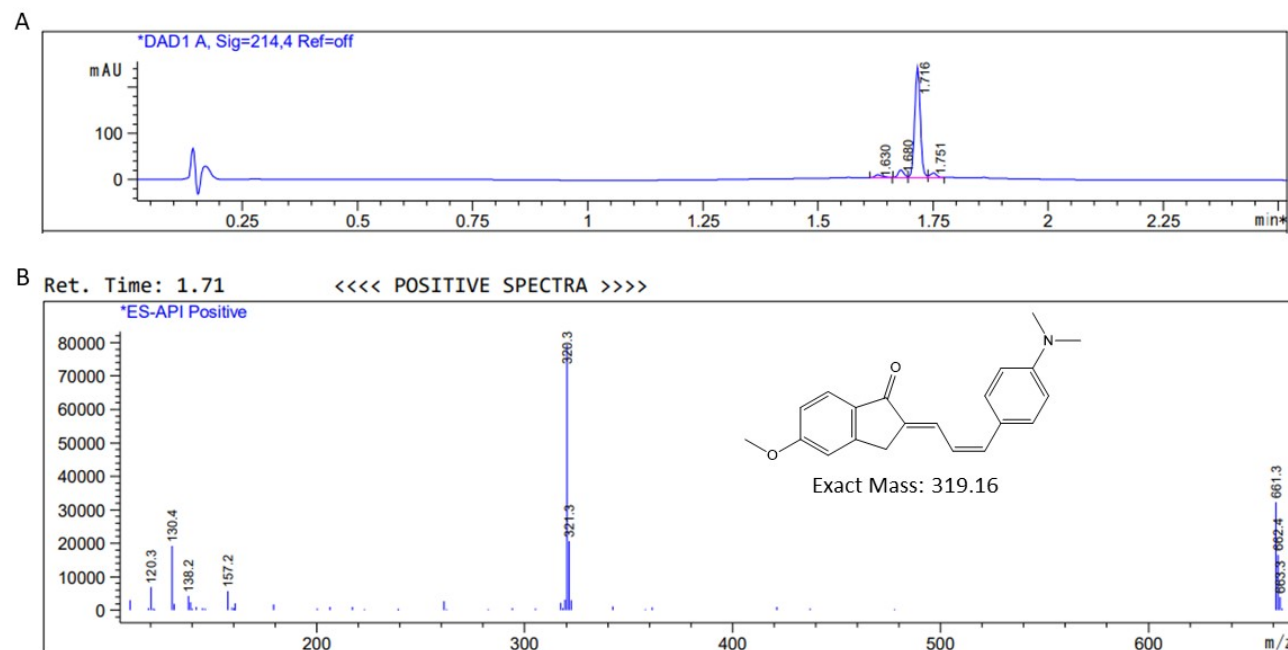

Figure 9. (A-B) LCMS data of the probe **Po-P**.

## Graphical Abstract

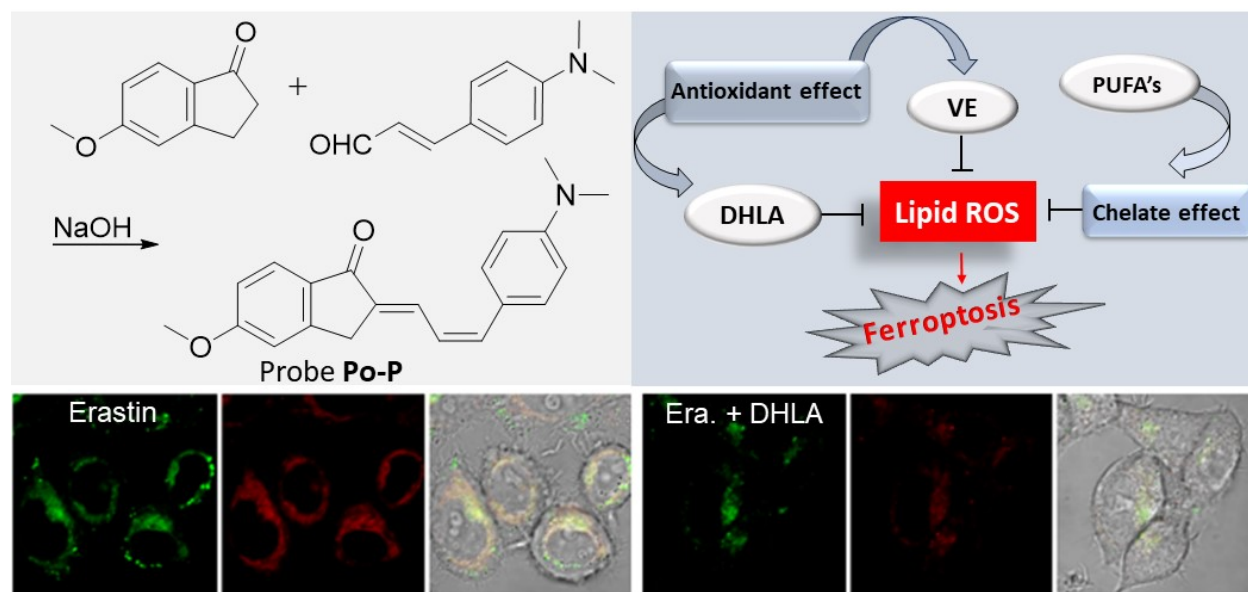

Supplement: d4ay00519h1.pdf [file d4ay00519h1.pdf]
